# Supplementary material for: Integrative Analysis of Proteomics and Metabolism Reveals the Potential Roles of Arachidonic Acid Metabolism in Hypoxia Response in Mouse Spleen
Source: MDPI journal article supplement (doi:10.3390/molecules27228102), 2022-11-21
Supplement: s1 [file s1]

Supplementary Figures

Integrative Analysis of Proteomics and Metabolism Reveals the Potential Roles of Arachidonic Acid Metabolism in Hypoxia Response in Mouse Spleen

Yujing Guo <sup>†</sup>, Sheng Yong <sup>†,\*</sup>, Yuzhen Xu, Ying Hu, Jidong Li, Qifu Long, Xiaojun Wang, Cunlin Gu and Zengqiang Miao

Medical College of Qinghai University, Xining 810016, China  
\* Correspondence: yongsheng@qhu.edu.cn  
<sup>†</sup> These authors contributed equally to this work.

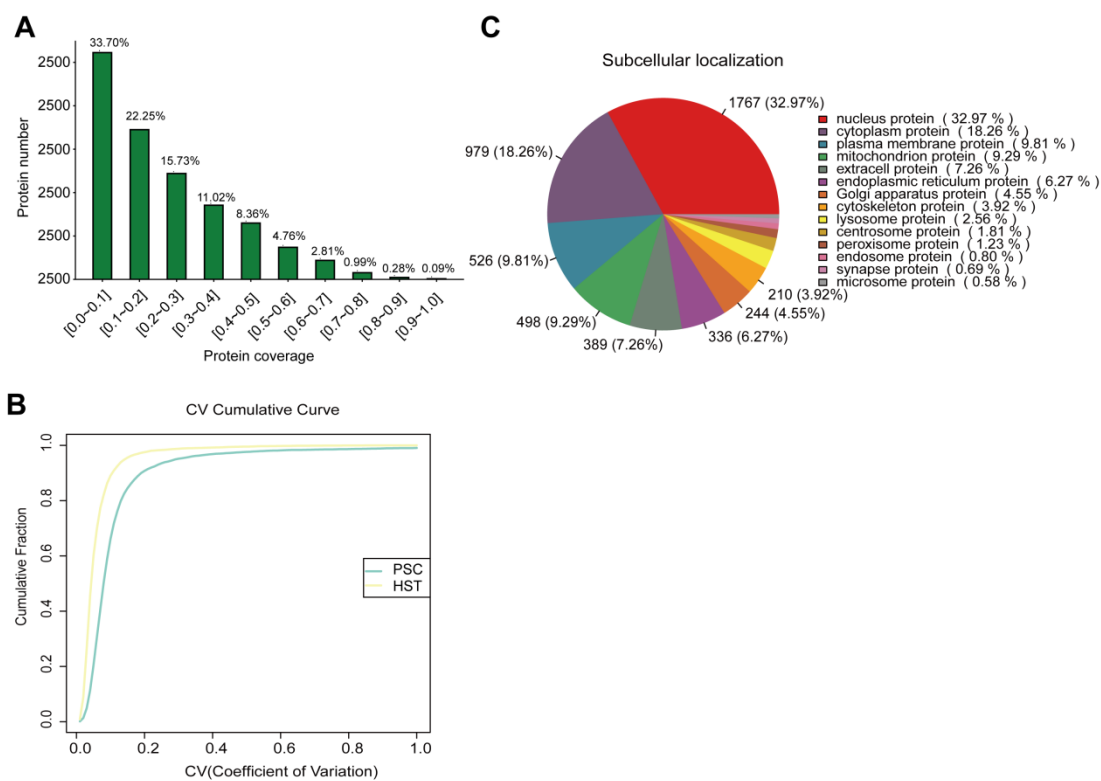

**Figure S1.** Protein identification and subcellular localization analysis **A**, Protein number distribution across different protein coverage mapped to peptides detected. **B**, Cumulative fraction analysis against the coefficient of variation in two groups. **C**, The subcellular localization analysis on the total 7727 proteins annotated based on proteomics analysis.

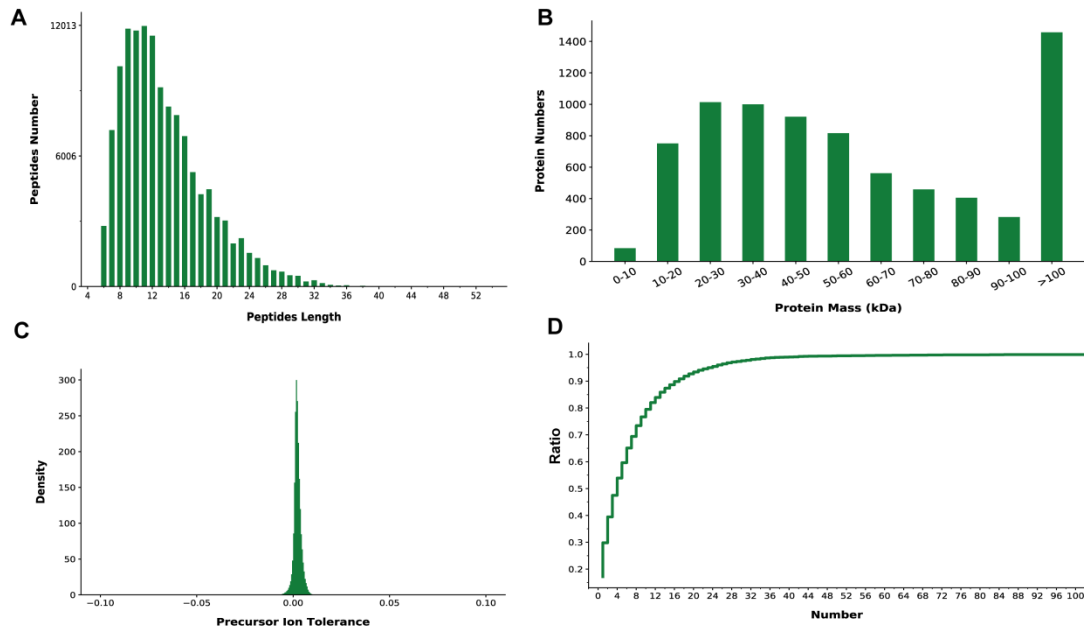

**Figure S2.** Quality control based on proteomic analysis. **A**, peptide analysis annotated across different peptides length. **B**, protein numbers distribution following different protein mass. **C**, histogram representing the density of mass spectrum signals along with different precursor ion tolerance. The numbers of total matched mass spectrum were 132,104. **D**, the ratio of unique peptides account for total peptides against different relative peptide numbers.

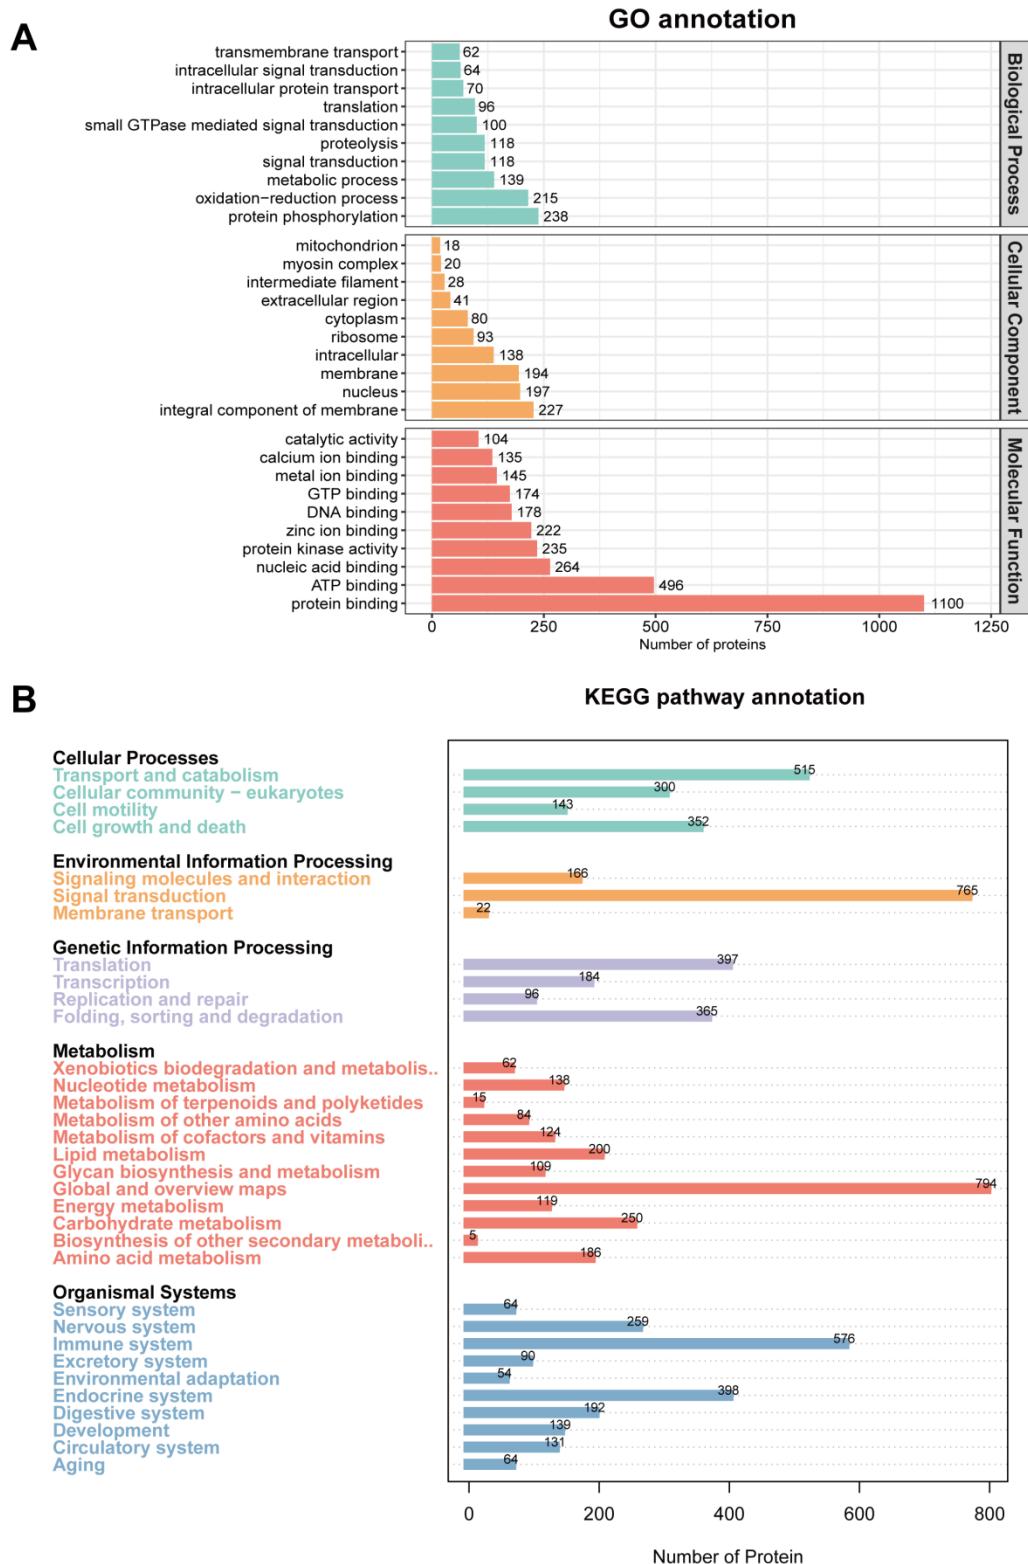

**Figure S3.** Bio-informatics analysis on the 7,727 protein annotated in mice spleen. **A**, Gene ontology (GO) analysis. **B**, Kyoto encyclopedia of genes and genomes (KEGG) analysis.

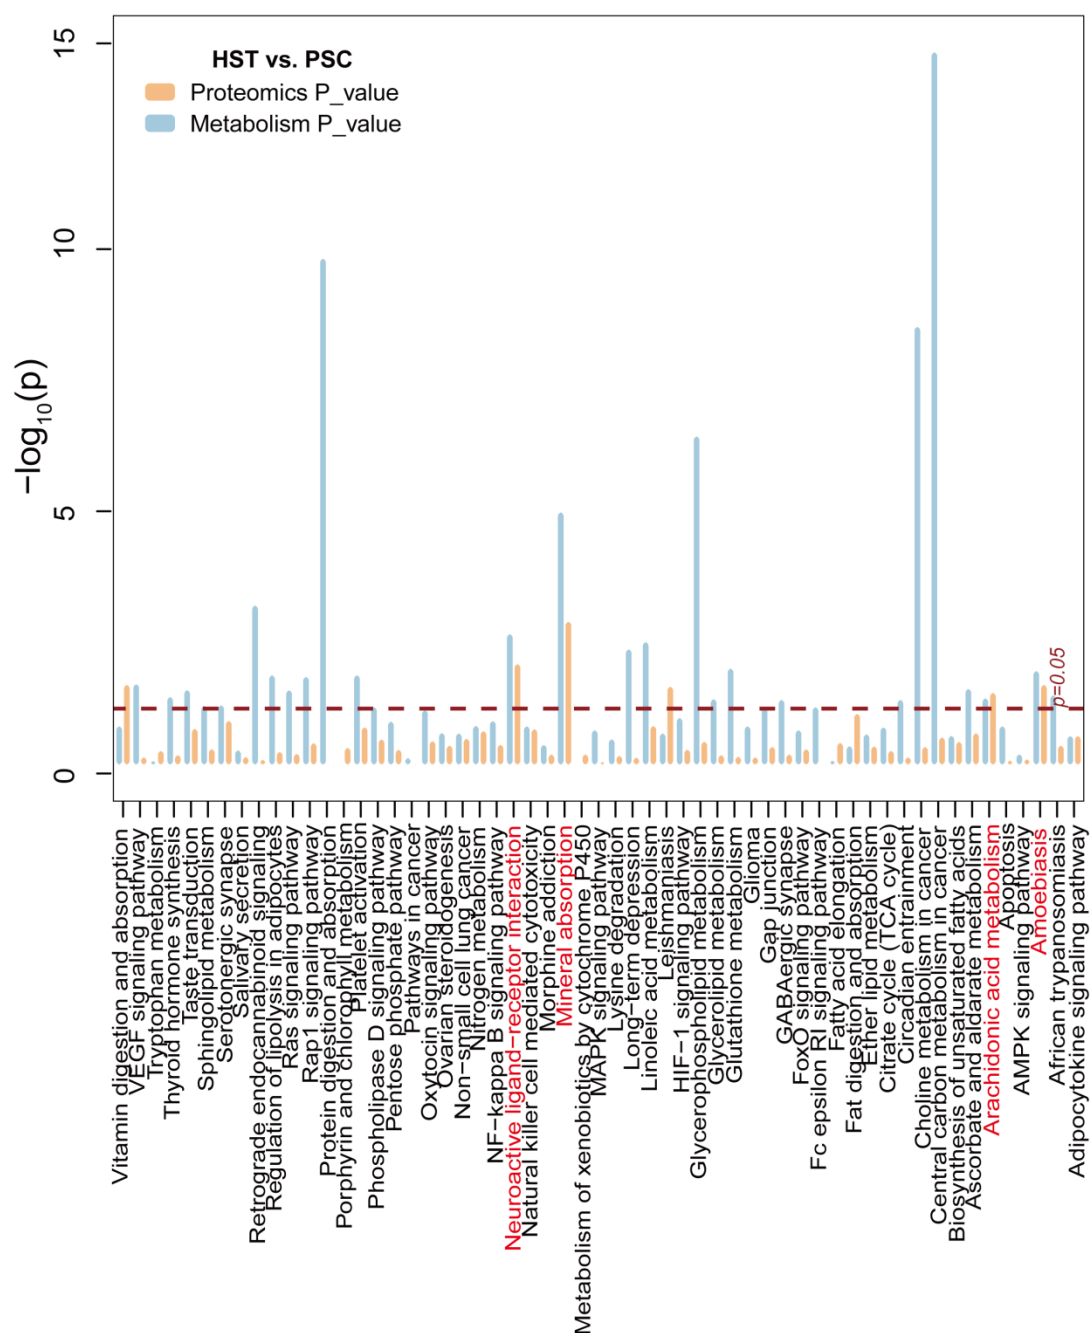

**Figure S4.** Overlapped KEGG terms on the list of differentially expressed proteins and differentially abundant metabolites. The dot line represents significant levels based on Fisher  $t$ -test at  $P<0.05$ . The red fonts represent the top 4 KEGG terms that referred to Figure 3C.

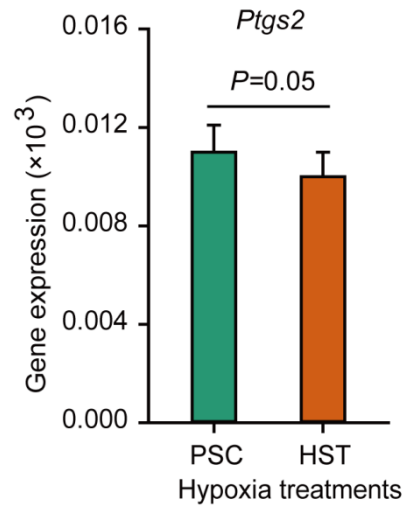

**Figure S5.** Relative expression levels of *Ptgs2* in spleen of mice exposed to either hypoxia or normoxia conditions. Each bar data represents the mean ( $\pm$ SE) of 3 different biological replicates.

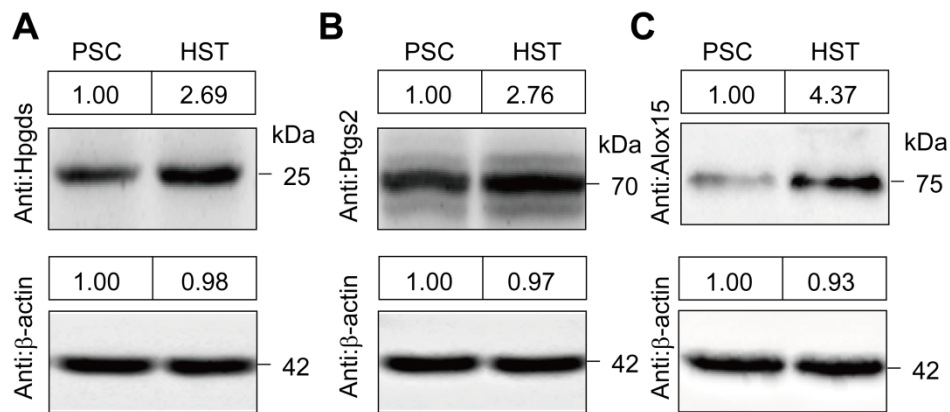

**Figure S6.** Western blot validation of two genes related to arachidonate acid metabolism in hypoxia-treated spleen of mice. **A**, Hpgds protein expression level. **B**, Ptgs2 protein expression level. **C**, Alox15 protein expression level. The numbers indicate the relative signal strength analyzed by Image J software. Antibodies of Hpgds and Ptgs2 were used to perform the western blot with at least three biological replicates.
